# Supplementary material
Source: PubMed Central journal article supplement (PMC6652227)

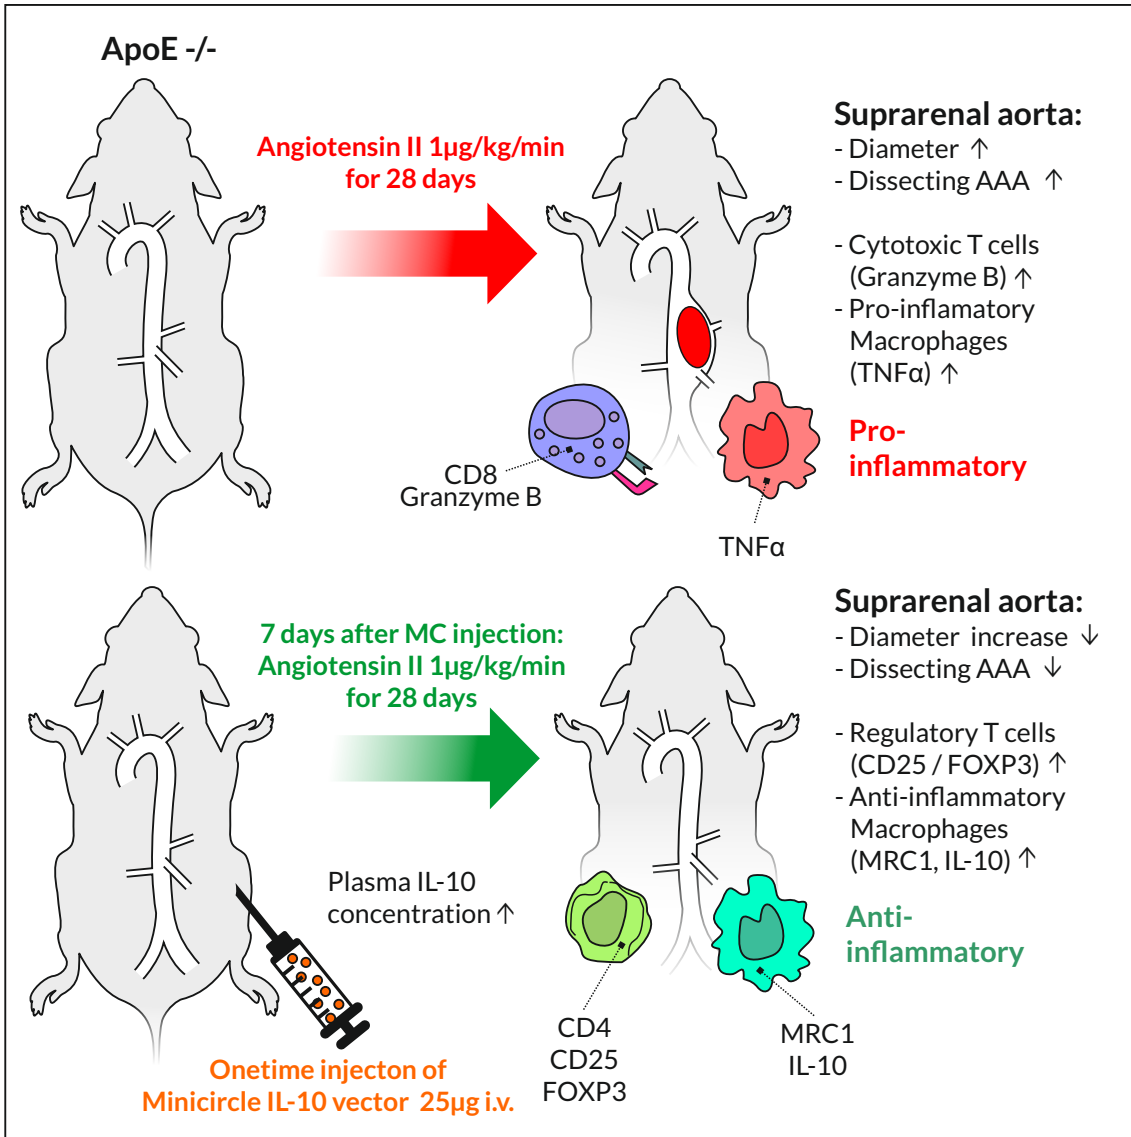

Supplement: NIHMS970645-supplement-Graphic_Abstract.pdf [file NIHMS970645-supplement-Graphic_Abstract.pdf]
